# Supplementary material for: Glucocorticoids coordinate macrophage metabolism through the regulation of the tricarboxylic acid cycle
Source: PubMed Central journal article supplement (PMC8783148; doi:10.1016/j.molmet.2021.101424), 2021-12-22
Supplement: mmc4.pdf [file mmc4.pdf]

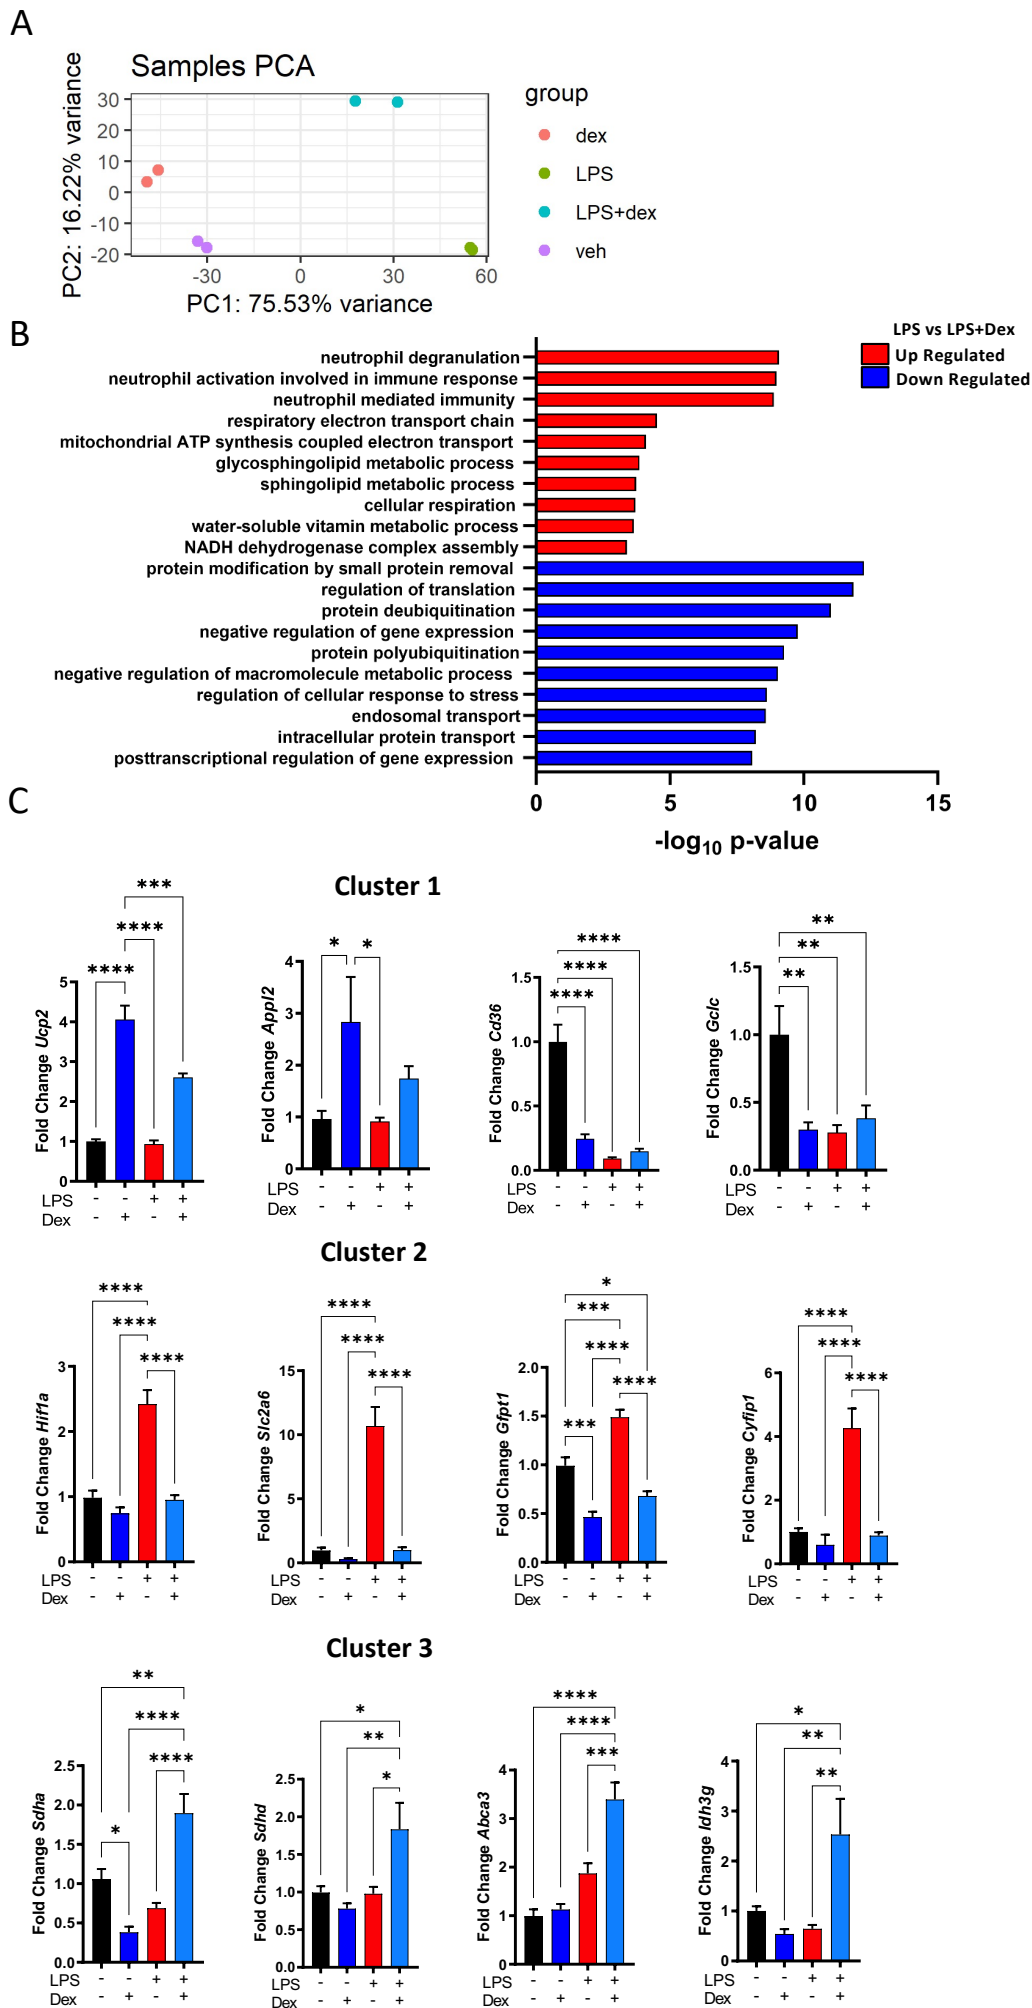

Figure. S1

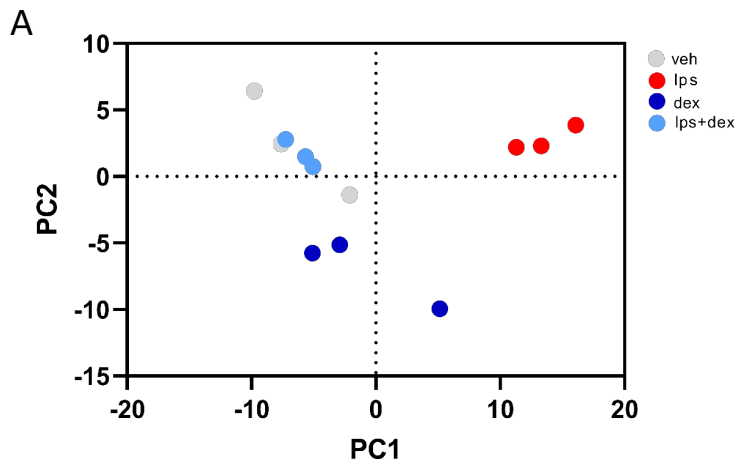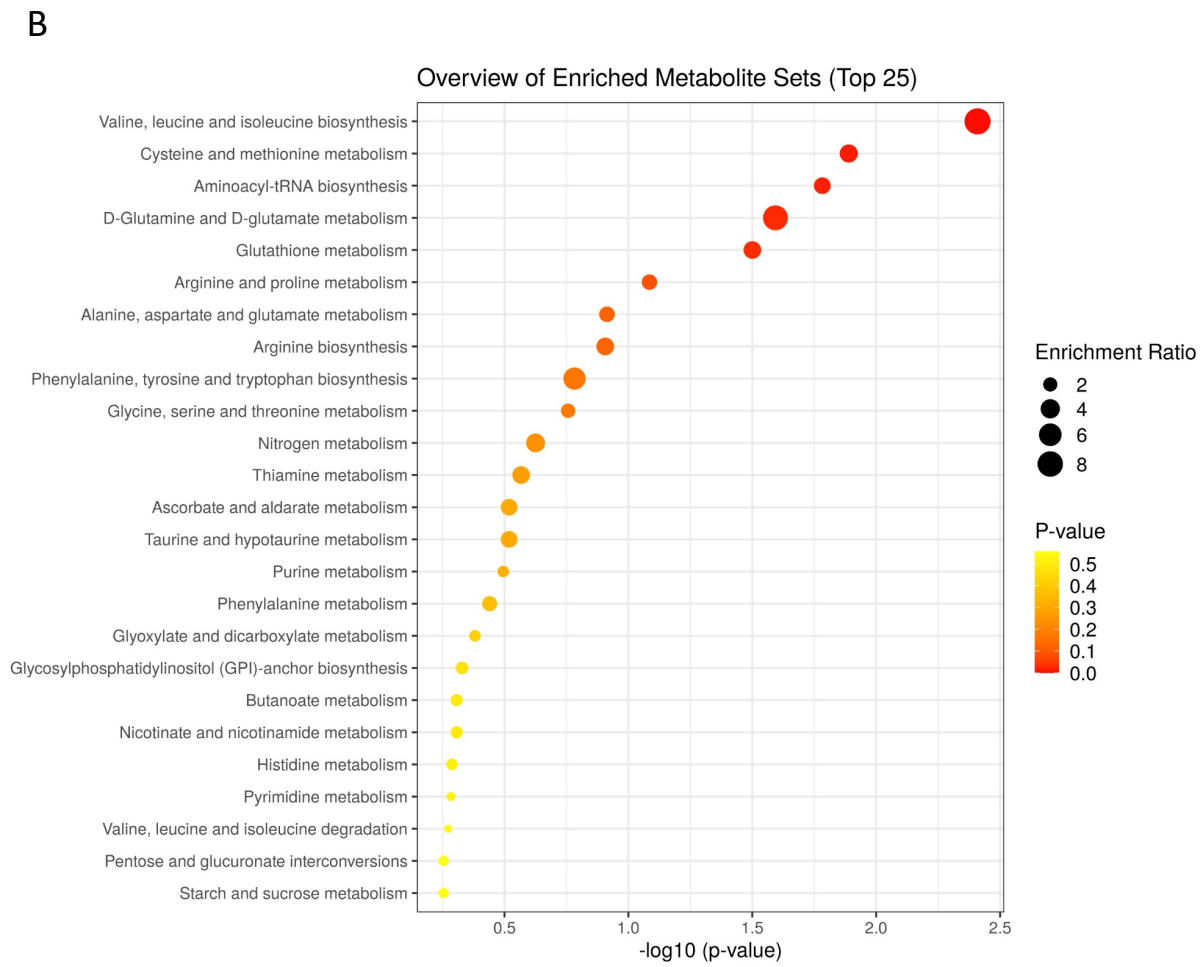

**C** Copy Number

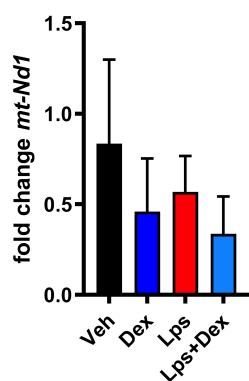

Figure. S2

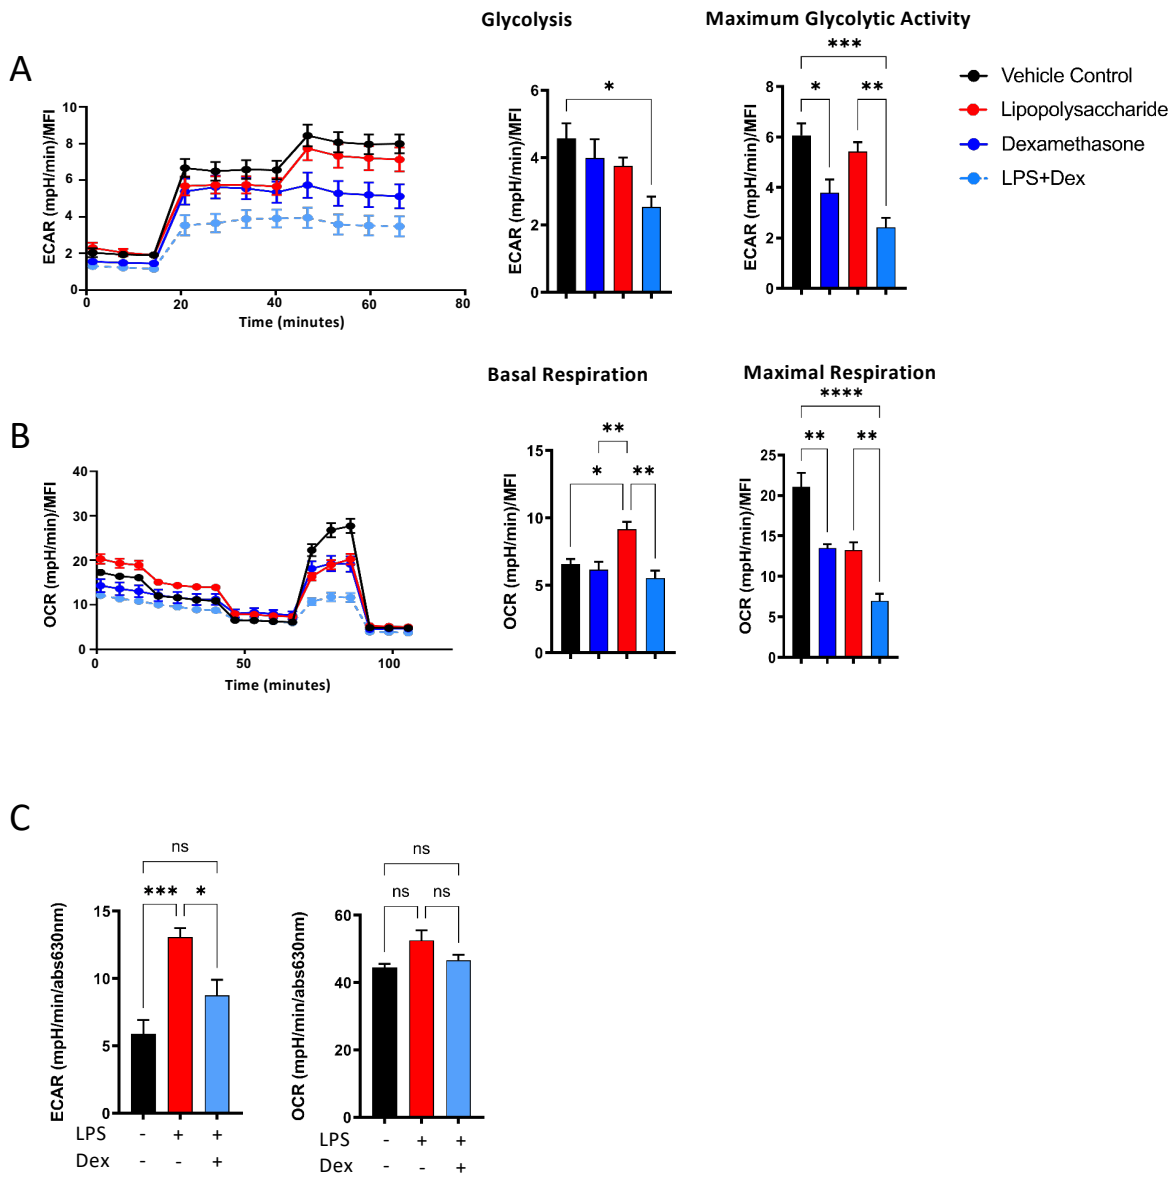

Figure. S3

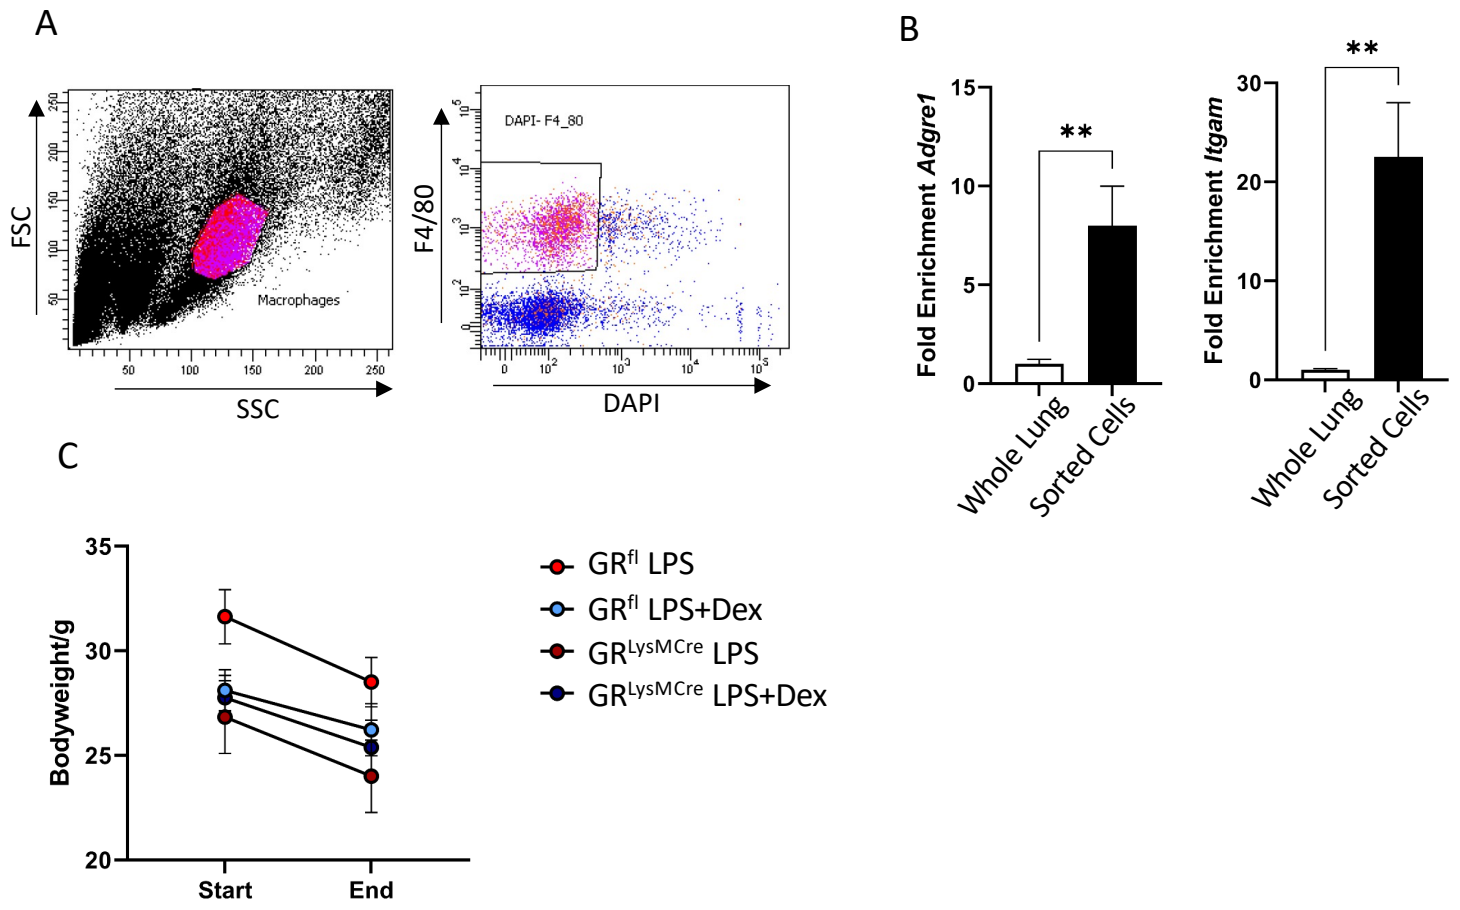

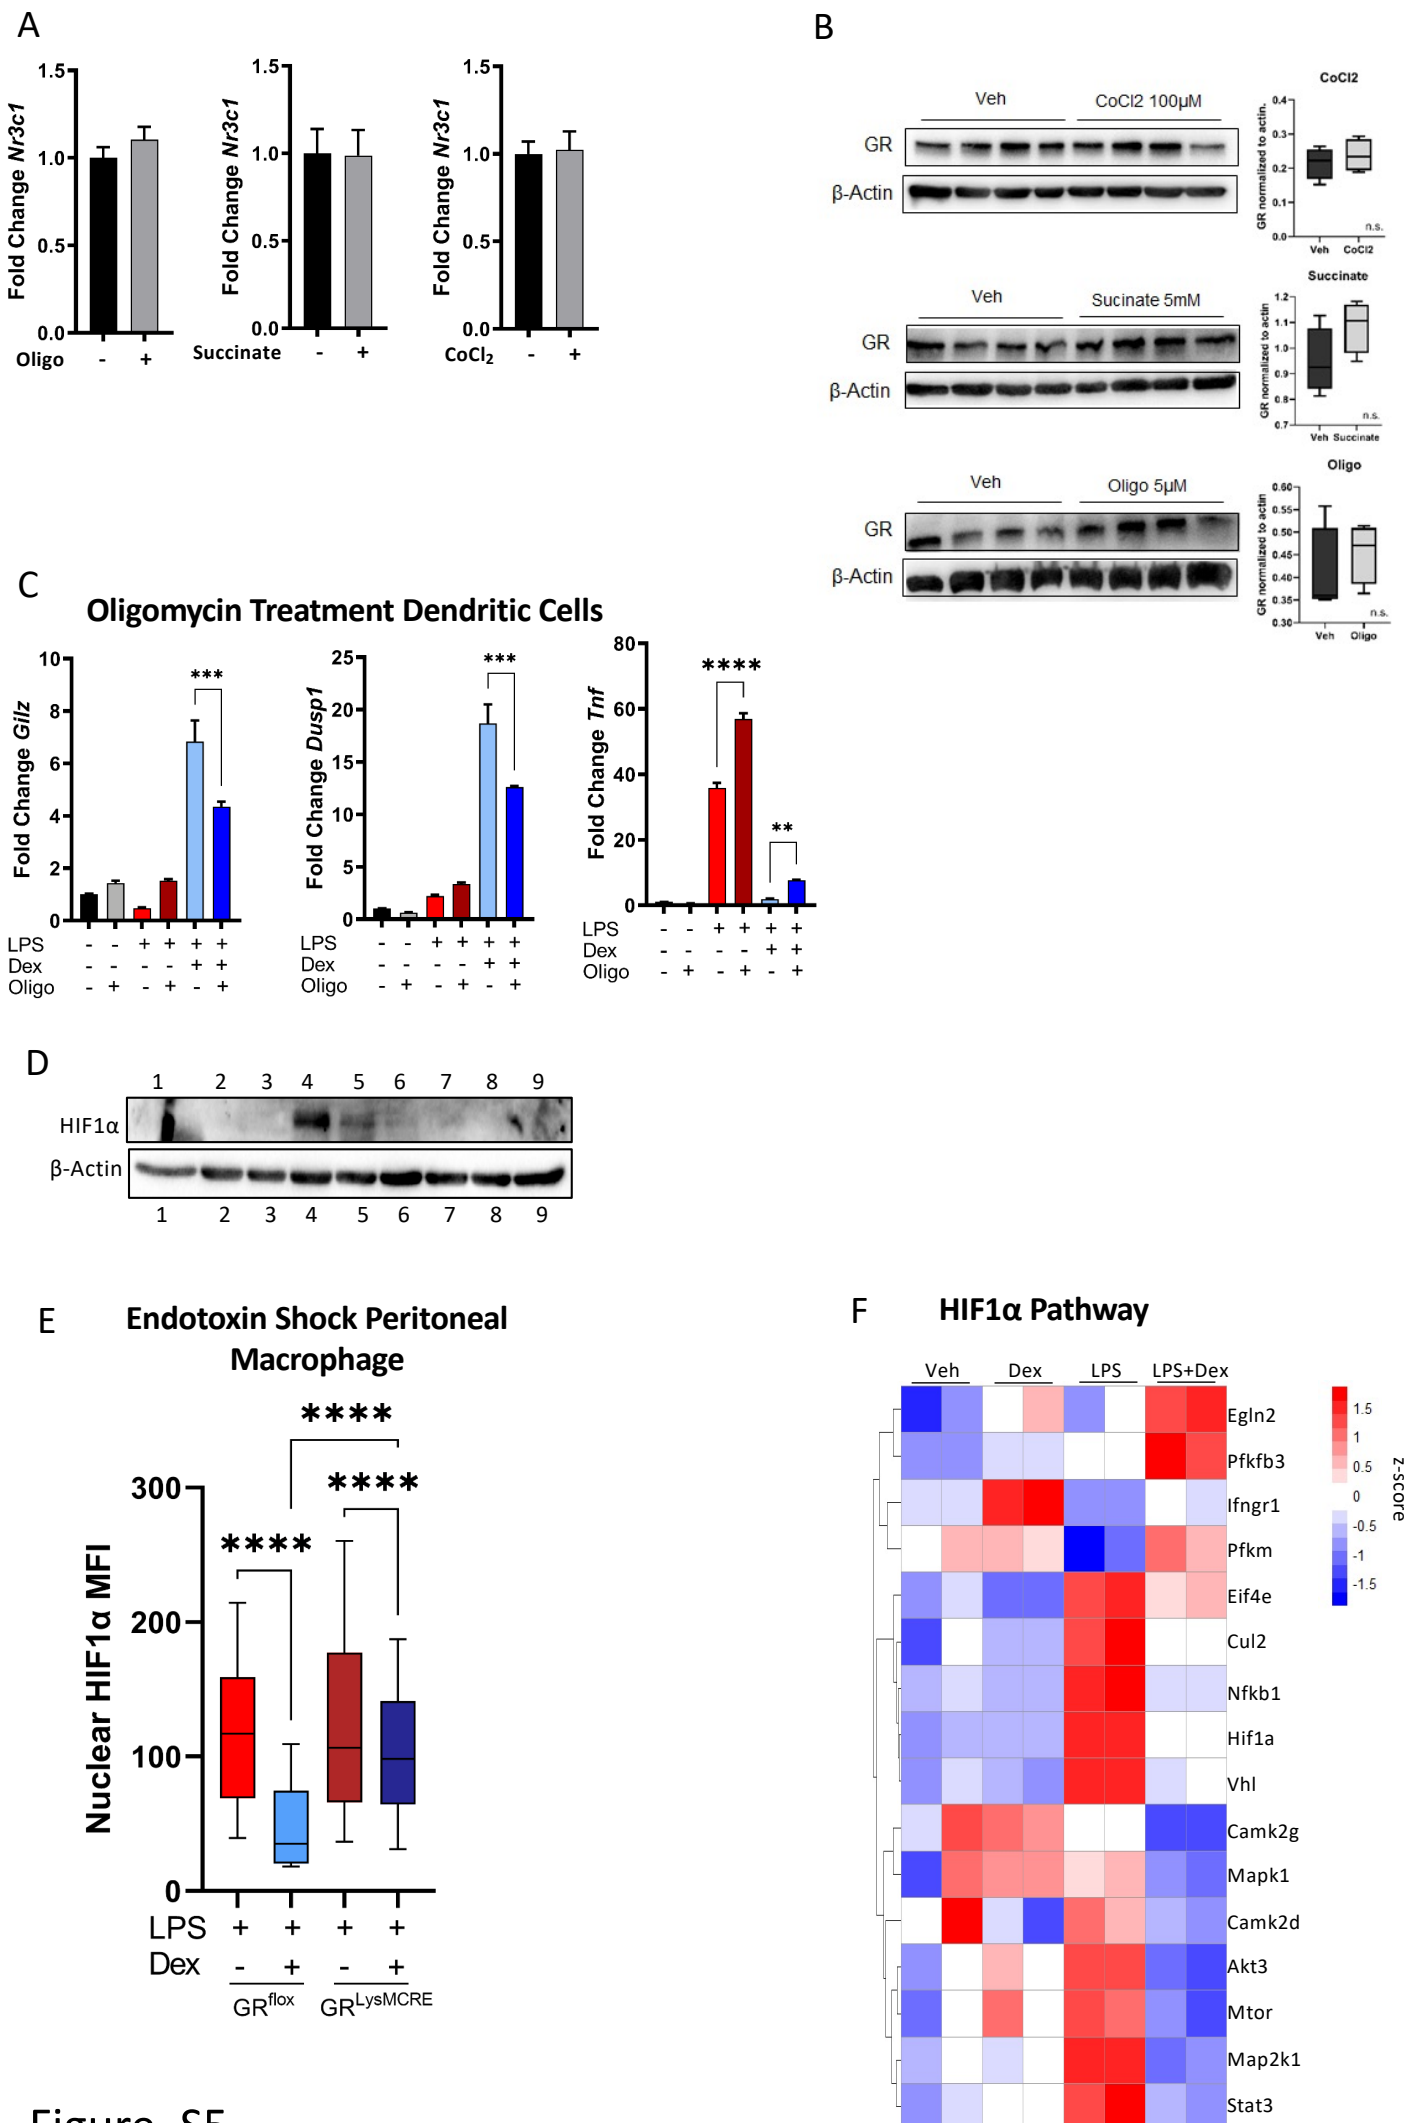

Figure. S5
